# Supplementary material
Source: PubMed Central journal article supplement (PMC3710851)
Supplement: 1221091110_pnas.201221091SI.pdf [file 1221091110_pnas.201221091SI.pdf]

# Supporting Information

Masson 10.1073/pnas.1221091110

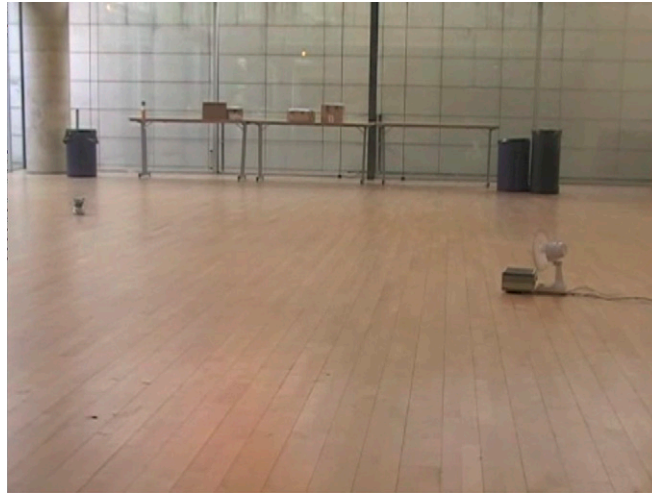

**Movie S1.** A very efficient experimental Mapless search without wind information. The speed of the video has been multiplied by 4.

[Movie S1](#)

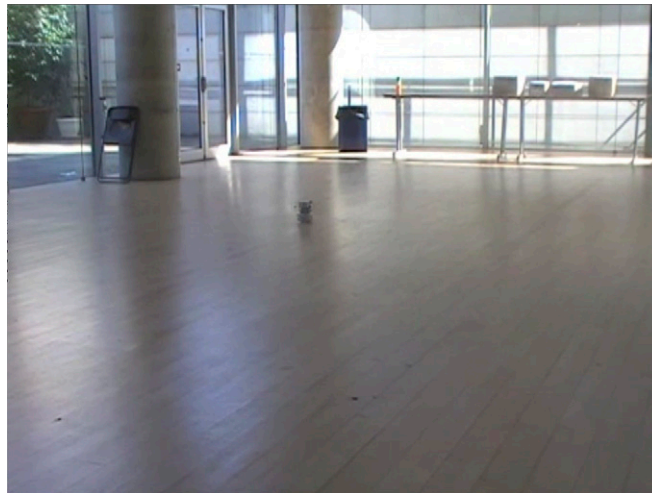

**Movie S2.** An experimental Mapless search without wind information. The speed of the video has been multiplied by 4.

[Movie S2](#)

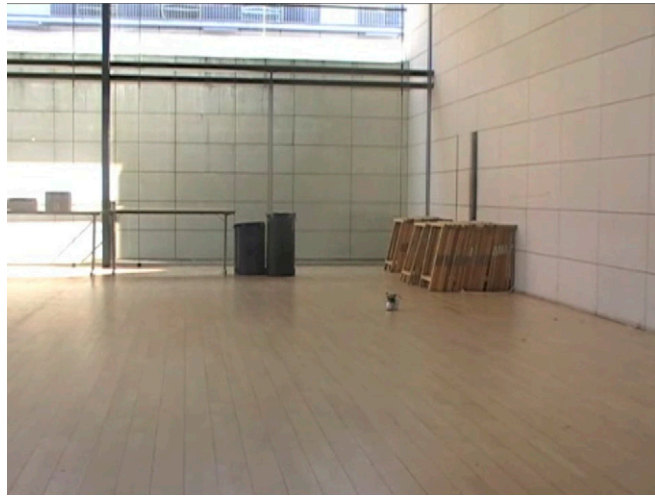

**Movie S3.** A long experimental Mapless search without wind information. The speed of the video has been multiplied by 8.

[Movie S3](#)

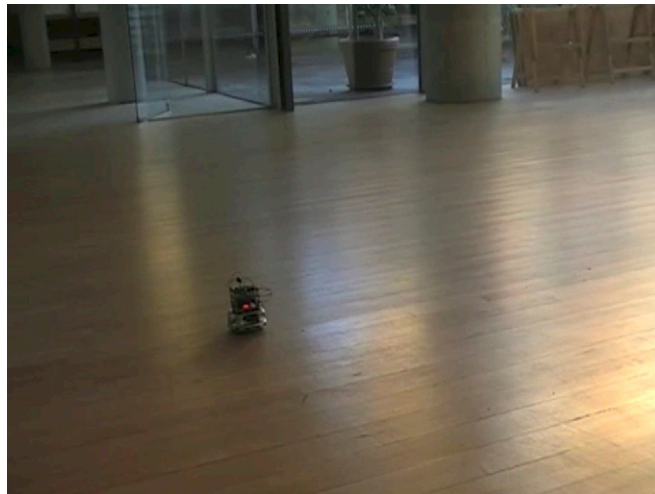

**Movie S4.** An experimental Mapless search with wind information. The speed of the video has been multiplied by 4.

[Movie S4](#)

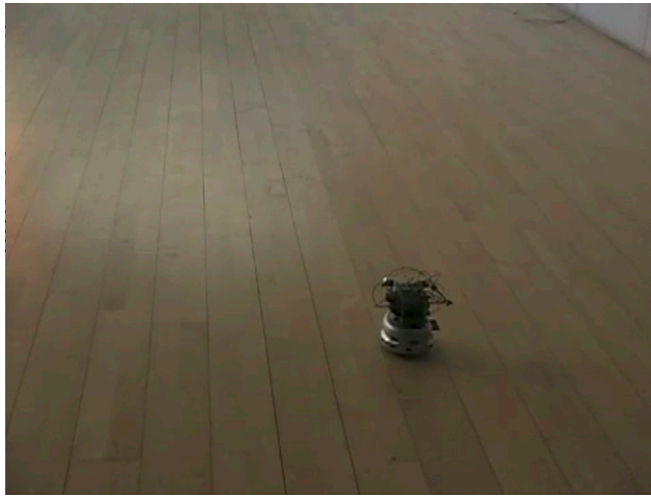

**Movie S5.** An experimental Mapless search with wind information. The speed of the video has been multiplied by 4.

[Movie S5](#)

## Other Supporting Information Files

[SI Appendix \(PDF\)](#)
